# Supplementary material for: iPSC-derived exosomes promote diabetic wound healing by attenuating inflammatory responses
Source: Research Square preprint supplement (doi:10.21203/rs.3.rs-7083426/v1), 2025-09-17
Supplement: Supplementary file 1 [file 4cfb22f679b979bb0aad3b07.docx]

**Supporting Information**

**Title:** **iPSC-derived exosomes promote diabetic wound healing by attenuating inflammatory responses**

Li Long1, 3, Ju Qiao2, Liang Wang4, Yue Wang1, Yi Xu1, Hui Chen1, Hongzhong Jin2, *, Wei He1, * , Xiaohong Han3, * and Jianmin Zhang1, 4, 5, *

1Department of Immunology, CAMS Key laboratory T cell and Cancer Immunotherapy, Institute of Basic Medical Sciences, Chinese Academy of Medical Sciences and School of Basic Medicine, Peking Union Medical College, State Key Laboratory of Common Mechanism Research for Major Diseases, Beijing, 100005, China.

2Department of Dermatology, State Key Laboratory of Complex Severe and Rare Diseases, Peking Union Medical College Hospital, Chinese Academy of Medical Sciences and Peking Union Medical College, National Clinical Research Center for Dermatologic and Immunologic Diseases, Beijing, China.

3Clinical Pharmacology Research Center, Peking Union Medical College Hospital, Chinese Academy of Medical Sciences & Peking Union Medical College, State Key Laboratory of Complex Severe and Rare Diseases, NMPA Key Laboratory for Clinical Research and Evaluation of Drug, Beijing Key Laboratory of Clinical PK and PD Investigation for Innovative Drugs, Beijing 100730, China

4Guidon Pharmaceutics Ltd. Beijing, China.

5Changzhou Xitaihu Institute for Frontier Technology of Cell Therapy. Changzhou, Jiangsu province, 213000, China.

* To whom correspondence may be addressed:

Dr. Hongzhong Jin at E-mail: [jinhongzhong@263.net](mailto:jinhongzhong@263.net)

Dr. Wei He at E-mail: heweingd@126.com

Dr. Xiaohong Han at E-mail: hanxiaohong@pumch.cn

Dr. Jianmin Zhang at E-mail: [jzhang42@163.com](mailto:jzhang42@163.com)

**Supplementary Fig. 1**

**
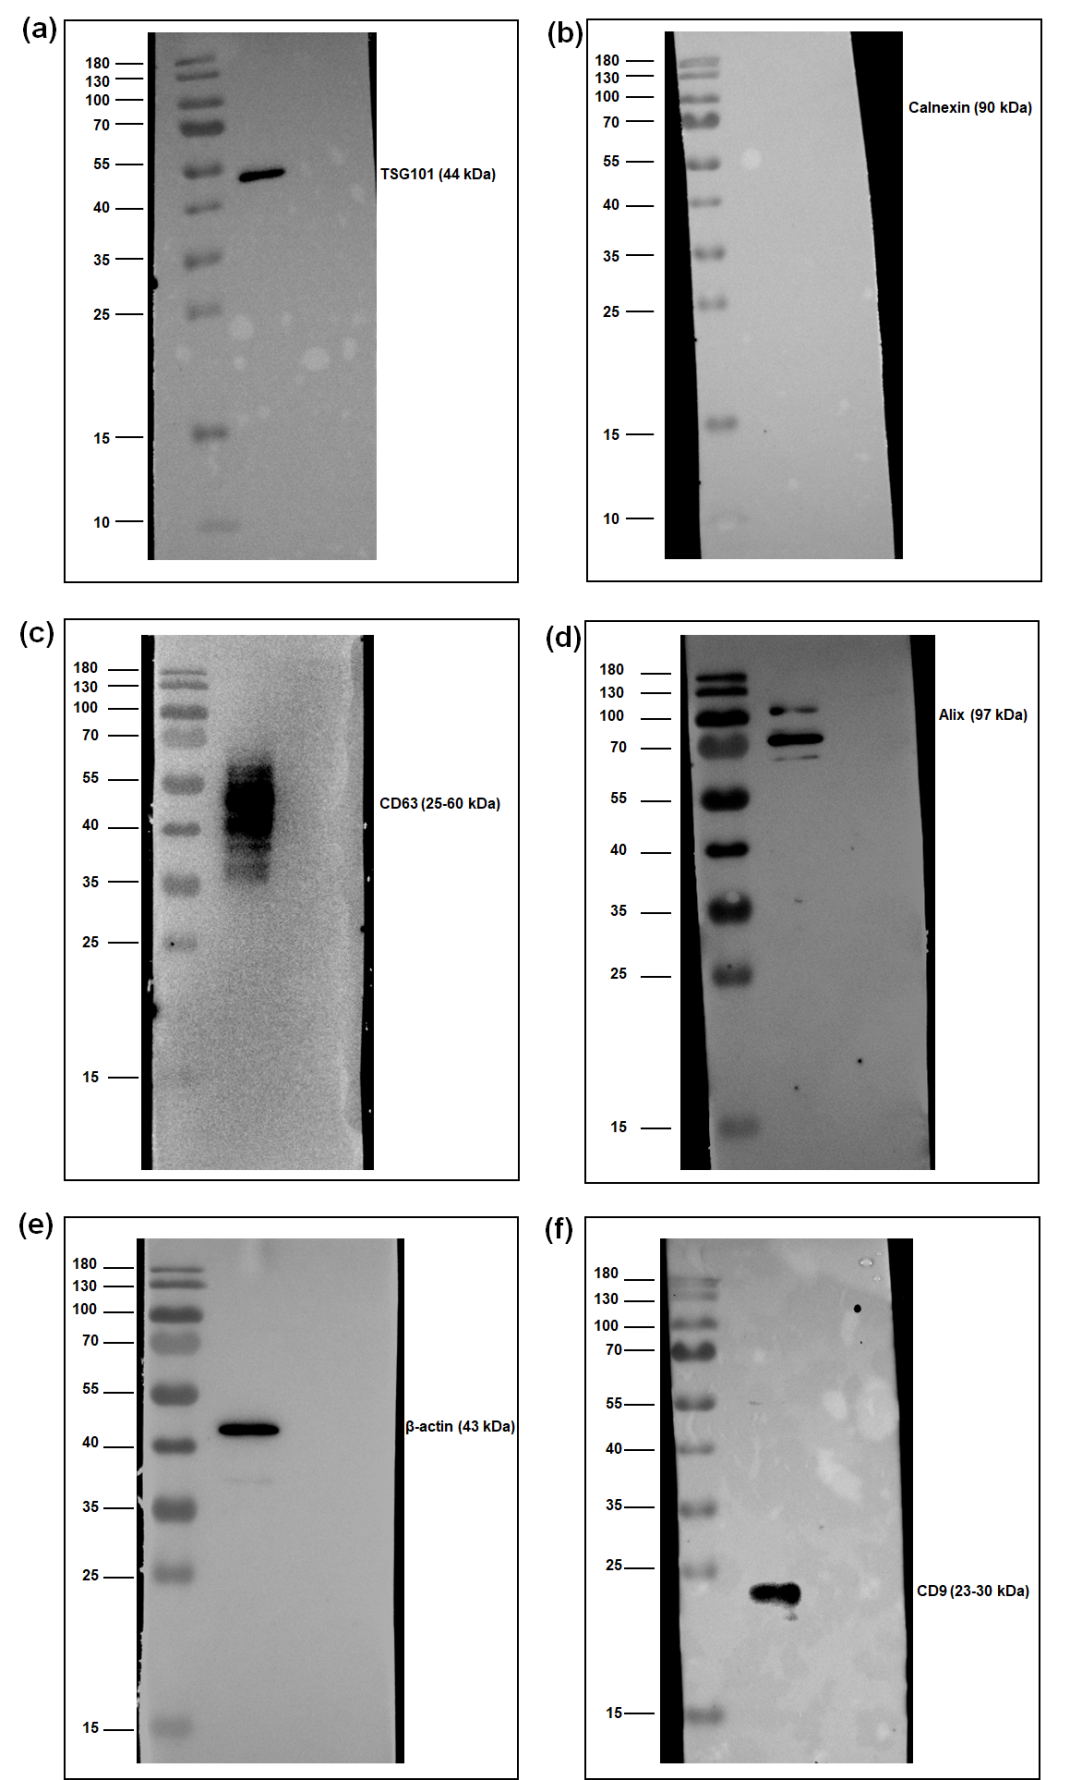
**

The original uncropped blots presented in the Fig. 1g. TSG101 (a), Calnexin (b), CD63 (c), Alix (d), β-actin (d), CD9 (e).
